# Supplementary material for: Crystal structure of the Schizosaccharomyces pombe U7BR E2-binding region in complex with Ubc7
Source: PubMed Central journal article supplement (PMC6688661; doi:10.1107/s2053230x19009786), 2019-08-02
Supplement: f-75-00552-sup1.pdf [file f-75-00552-sup1.pdf]

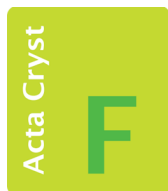

STRUCTURAL BIOLOGY  
COMMUNICATIONS

**Volume 75 (2019)**

**Supporting information for article:**

**Crystal structure of the *Saccharomyces pombe* U7BR E2-binding domain in complex with Ubc7**

**Zachary S. Hann, Meredith B. Metzger, Allan M. Weissman and Christopher D. Lima**

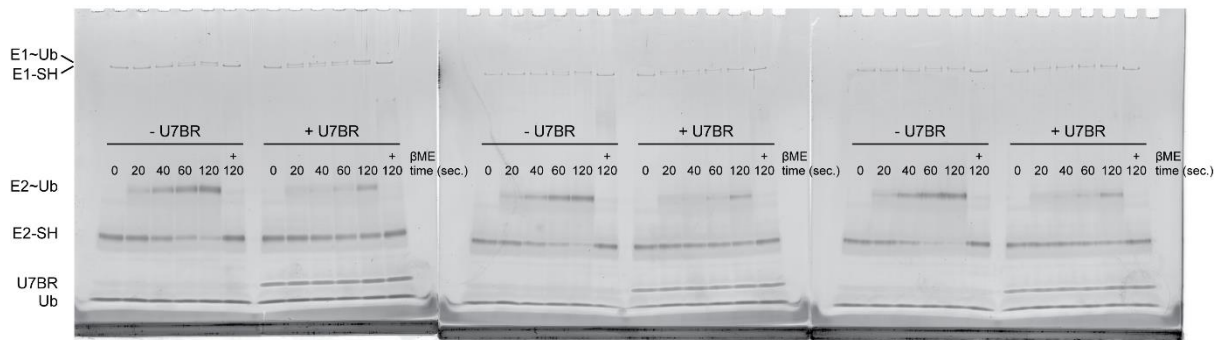

**Figure S1** SDS-PAGE analysis of transthiolation assays. Analysis of E1-mediated transthiolation reactions as measured by the appearance of Ubc7~Ub over the course of two minutes. SDS-PAGE gels were stained using SYPRO Ruby. Each reaction (with or without U7BR) was conducted in triplicate. The 120-second time point was re-run in a separate lane after treatment with  $\beta$ -mercaptoethanol ( $\beta$ ME) to disrupt the thioester bond. The 0 minute time point was taken before addition of ATP. Densitometry of E2-SH bands are plotted in Fig. 4a.
